# Supplementary material
Source: PubMed Central journal article supplement (PMC4019139)
Supplement: JVI.00021-14_zjv999099002so1.pdf [file JVI.00021-14_zjv999099002so1.pdf]

**Figure S1. GFP-nsp2 quantitation of replication complex formation in live cells.**

DBT cells on glass bottom culture dishes were infected with MHV-GFP2 at an MOI of 1 PFU/cell. At 5 h p.i., dishes were transferred to the 37°C chamber incubator, with imaging of DIC and GFP every 30 seconds for 2.5h.
